# Supplementary material
Source: PubMed Central journal article supplement (PMC7539298)
Supplement: ic0c01773_si_001.pdf [file ic0c01773_si_001.pdf]

Supporting Information for:

## **A $\beta$ <sub>5-x</sub> peptides: N-terminal truncation yields tunable Cu(II) complexes**

Nina E. Wezynfeld,<sup>a</sup> Aleksandra Tobolska,<sup>a,b</sup> Mariusz Mital,<sup>c</sup>  
Urszula E. Wawrzyniak,<sup>a</sup> Magdalena Z. Wiloch,<sup>d</sup> Dawid Płonka,<sup>c</sup>  
Karolina Bossak,<sup>d</sup> Wojciech Wróblewski,<sup>a</sup> Wojciech Bal<sup>c\*</sup>

<sup>a</sup> Chair of Medical Biotechnology, Faculty of Chemistry, Warsaw University of Technology, Noakowskiego 3, 00-664 Warsaw, Poland

<sup>b</sup> Faculty of Chemistry, University of Warsaw, Pasteura 1, 02-093 Warsaw, Poland

<sup>c</sup> Institute of Biochemistry and Biophysics, Polish Academy of Sciences, Pawińskiego 5a, 02-106 Warsaw, Poland

<sup>d</sup> Charge Transfer Processes in Hydrodynamic Systems group, Institute of Physical Chemistry, Polish Academy of Sciences, Kasprzaka 44/52, 01-224 Warsaw, Poland

\*E-mail: wbal@ibb.waw.pl (W. Bal)

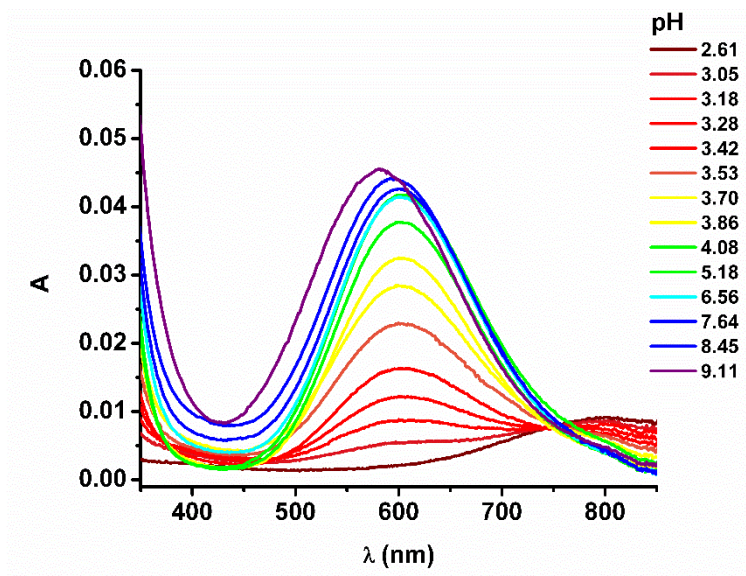

**Figure S1.** The pH dependence of UV-vis spectra recorded at 25 °C for 0.9 mM Cu(II) and 1.0 mM  $A\beta_{5-9}$ , at pH values color coded on the graphs.

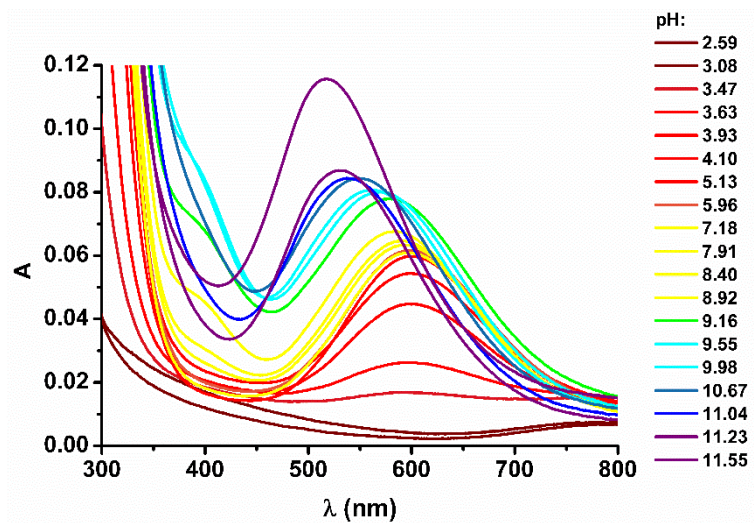

**Figure S2.** The pH dependence of UV-vis spectra recorded at 25 °C for 0.9 mM Cu(II) and 1.0 mM A $\beta_{5-12}$ , at pH values color coded on the graphs.

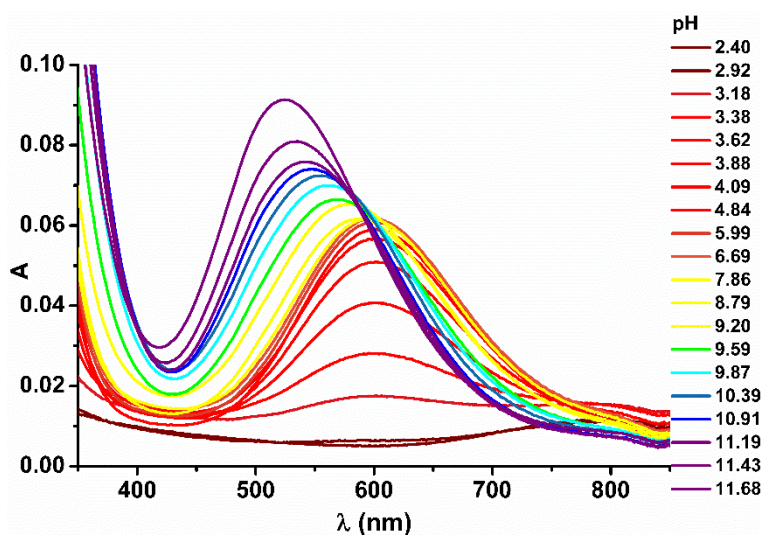

**Figure S3.** The pH dependence of UV-vis spectra recorded at 25 °C for 0.9 mM Cu(II) and 1.0 mM A $\beta_{5-12F_3}$ , at pH values color coded on the graphs.

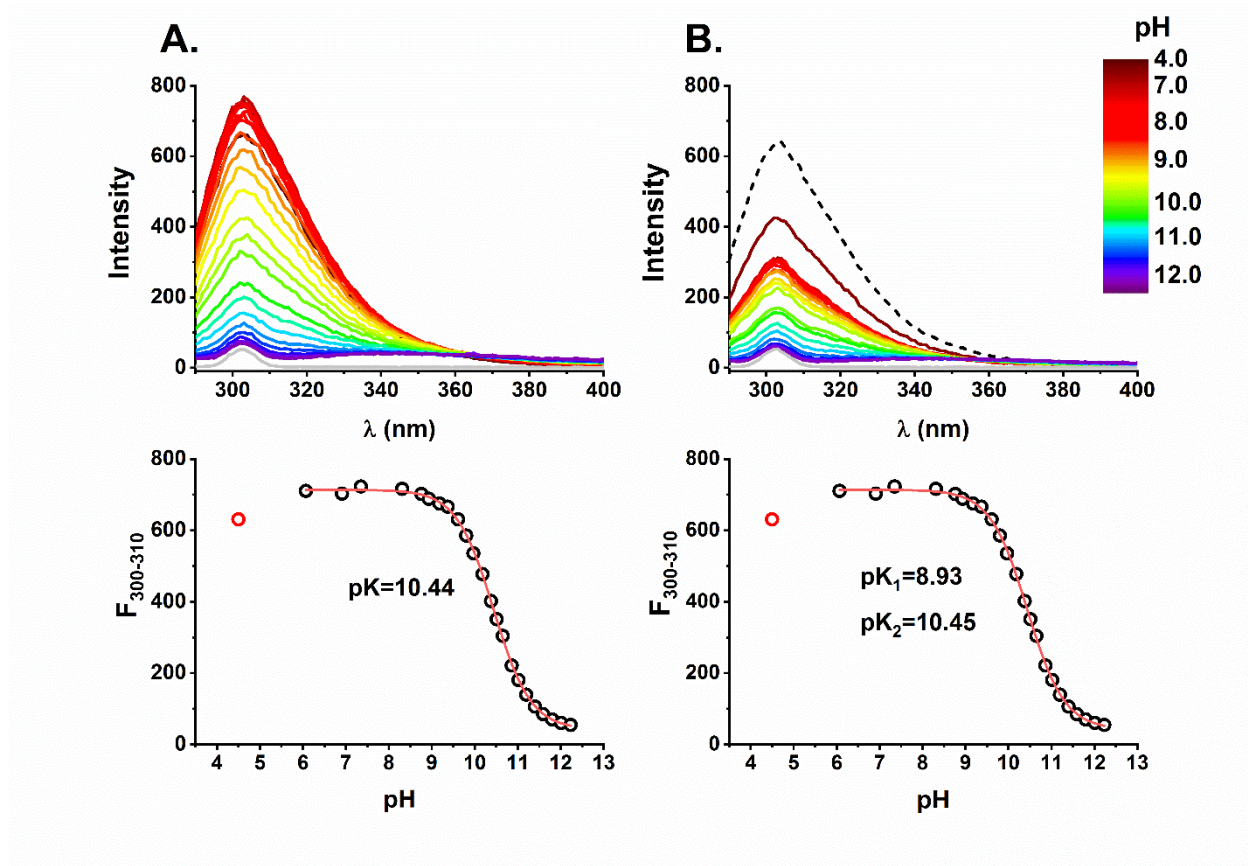

**Fig. S4.** Fluorescence spectra (top) and the respective curves (bottom) for 20  $\mu$ M  $A\beta_{5-12}$  (A.) or 20  $\mu$ M  $A\beta_{5-12}/Cu(II)$  (B.) titrated with NaOH at pH values color coded as present on the graph. The titration curves were generated by averaging spectral intensities over the 300-310 nm range for better signal-to-noise ratios.

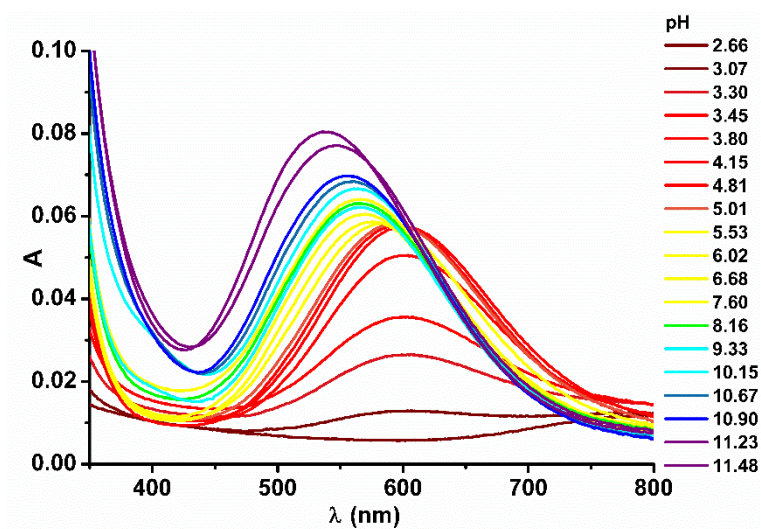

**Figure S5.** The pH dependence of UV-vis spectra recorded at 25 °C for 0.9 mM Cu(II) and 1.0 mM A $\beta_{5-16}$ , at pH values color coded on the graphs.

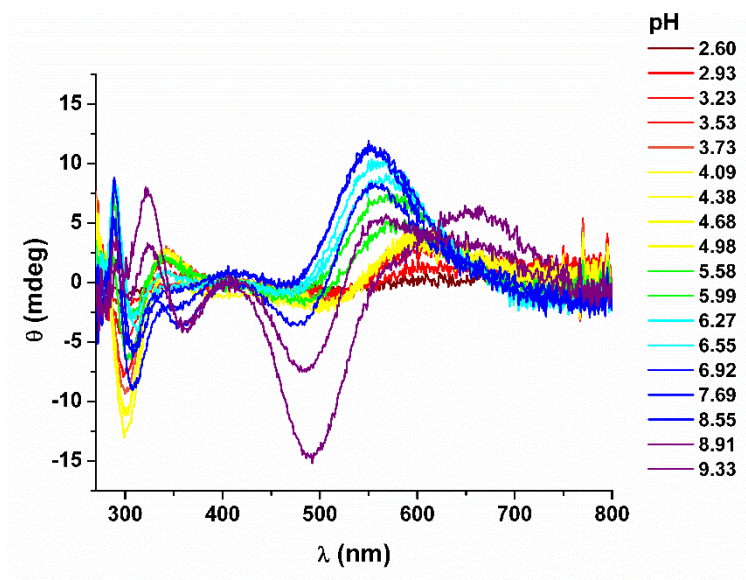

**Figure S6.** The pH dependence of CD spectra recorded at 25 °C for 1.8 mM Cu(II) and 1.0 mM A $\beta_{5-16}$ , at pH values color coded on the graphs.



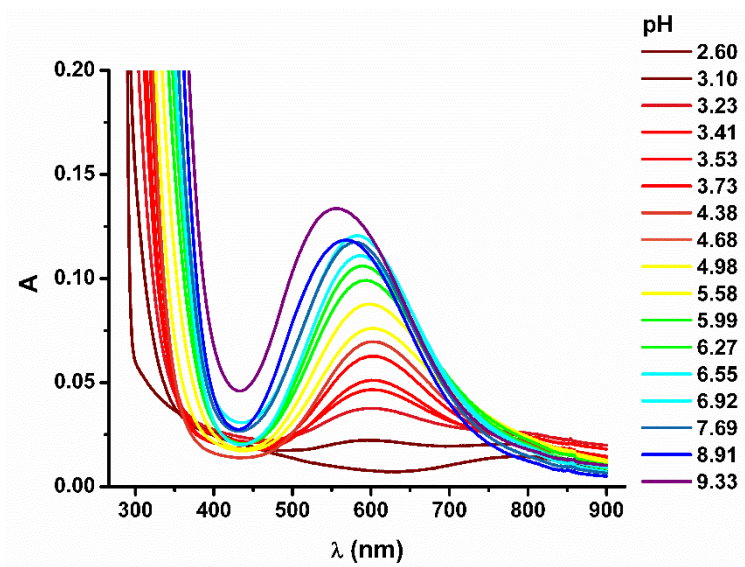

**Figure S7.** The pH dependence of UV-vis spectra recorded at 25 °C for 1.8 mM Cu(II) and 1.0 mM A $\beta_{5-16}$ , at pH values color coded on the graphs.

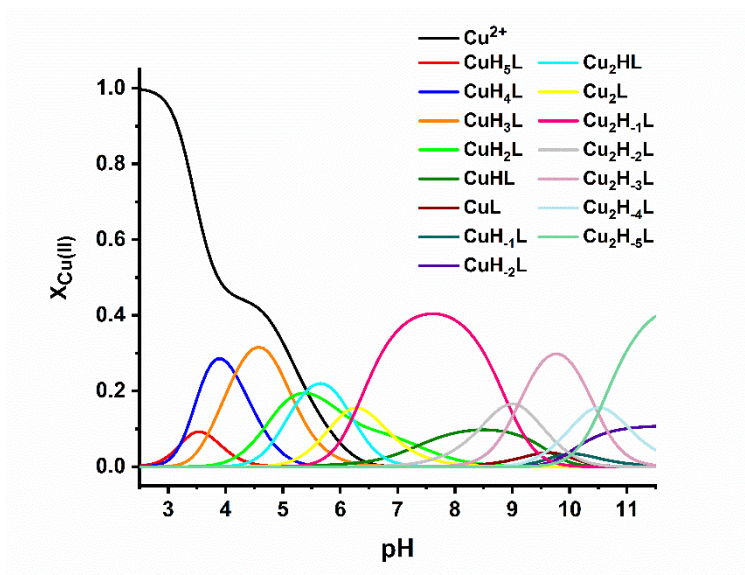

**Figure S8.** Species distribution calculated for 0.9 mM Cu(II) and 1.8 mM A $\beta_{5-16}$ , on the basis of constants presented in Tables 1 and 2.

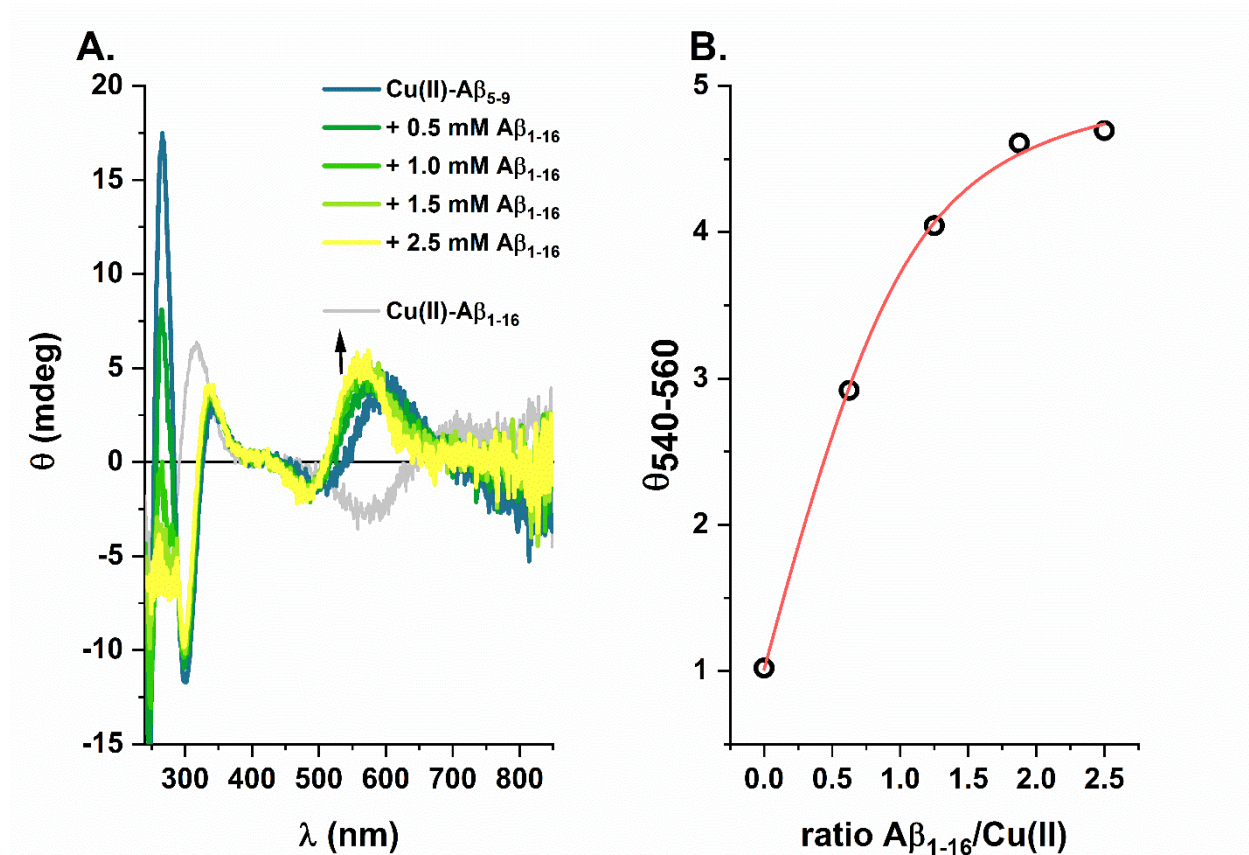

**Fig. S9.** CD titration spectra (A.) and a resulting titration curve (B.) for Cu(II) complexes of A $\beta_{5-9}$  with A $\beta_{1-16}$  for 1 mM A $\beta_{5-x}$  and 0.8 mM Cu(II) at pH 7.4. The increasing A $\beta_{1-16}$  concentrations are color-coded from blue to yellow. The control spectrum of 1 mM A $\beta_{1-16}$  and 0.8 mM Cu(II) at pH 7.4 is present as a grey line. The directions of changes are marked by an arrow. The titration curves were generated by averaging spectral intensities over the given wavelength ranges for better signal-to-noise ratios.

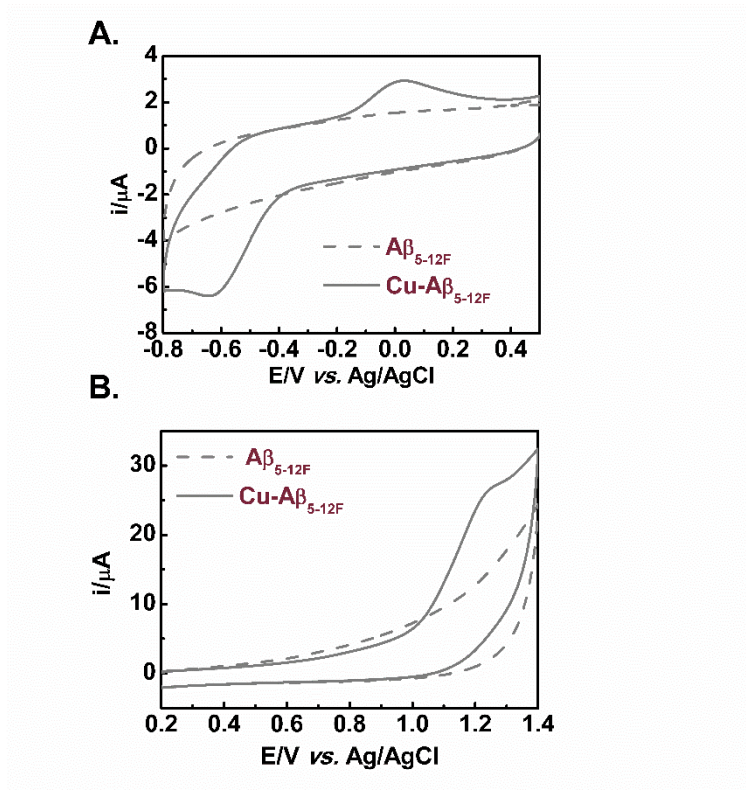

**Figure S10.** CV recorded in 0.5 mM  $A\beta_{5-12F}$  solution in the absence (dashed lines) or the presence of 0.40 mM Cu(II) (solid lines) in 96 mM  $KNO_3$ , 4 mM  $HNO_3$ , pH 7.4,  $v = 100$  mV/s over 0.5 to -0.8 V (A.) and 0.2 to 1.4 V (B.) potential range.

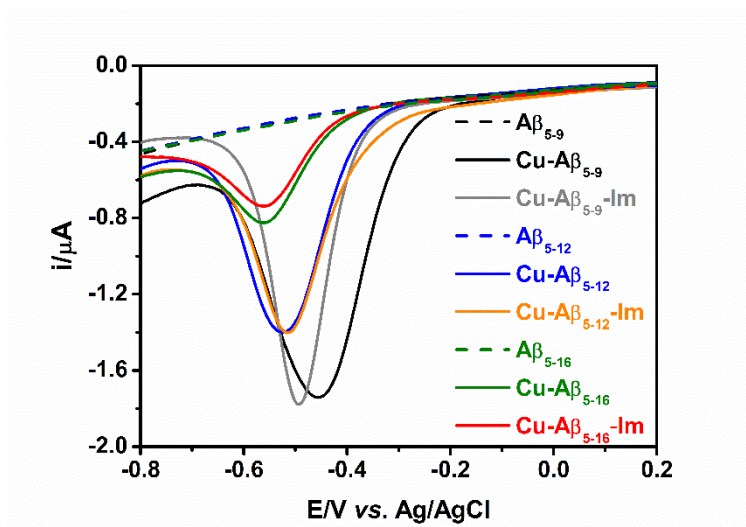

**Figure S11.** DPV recorded in 0.5 mM  $A\beta_{5-9}$ ,  $A\beta_{5-12}$ ,  $A\beta_{5-16}$  solutions in the absence (dashed lines) or in the presence of 0.40 mM Cu(II) and 5 mM imidazole in 96 mM  $KNO_3$ , 4 mM  $HNO_3$ , pH 7.4.
